# Supplementary material for: Development and formative evaluation of an innovative mHealth intervention for improving coverage of community-based maternal, newborn and child health services in rural areas of India
Source: PubMed Central journal article supplement (PMC4335194; doi:10.3402/gha.v8.26769), 2015-02-16
Supplement: GHA-8-26769-s001.pdf [file GHA-8-26769-s001.pdf]

### Supplementary files

1. Counseling tools, in form of short videos (picture stories) that is being played on mobile phone by frontline workers, is available at <http://www.youtube.com/user/sewarural>
2. Training tools including introductory training video is available at <http://www.youtube.com/watch?v=c8VJ7QjZLo8>
3. Project website is [www.imtecho.com](http://www.imtecho.com)
